# Supplementary material
Source: PubMed Central journal article supplement (PMC5481556)
Supplement: 10.1074_M116.766329_jbc.M116.766329-3.pdf [file 10.1074_M116.766329_jbc.M116.766329-3.pdf]

**Table S1: Oligonucleotides used for Gene Expression Analysis by RT-PCR**

| Name                                     | Gene Symbol    | Primer Sequence                                               |
|------------------------------------------|----------------|---------------------------------------------------------------|
| G <sub>M</sub>                           | <i>Ppp1r3a</i> | 5'-TCTGTCTGATTCTGTGTGTGAGG-3'<br>5'-GAGGTTGGAGTGTCCAGATACA-3' |
| G <sub>L</sub>                           | <i>Ppp1r3b</i> | 5'-AGCCGTACAATGGACCAGAT -3'<br>5'-AGTAGTAGGGCCCCAGCTTT-3';    |
| PTG                                      | <i>Ppp1r3c</i> | 5'-AGGAAGCCAAATCGCAGAGT-3'<br>5'-AAGTTTTAAGCTGGAGGAGATA-3'    |
| GYS2                                     | <i>Gys2</i>    | 5'-CGCTCCTTGTCGGTGACATC-3'<br>5'-CATCGGCTGTCTGTTTTGGC-3'      |
| Glycogen Phosphorylase (GP)              | <i>Pygl</i>    | 5'-GAGAAGCGACGGCAGATCAG-3'<br>5'-CTTGACCAGAGTGAAGTGCAG-3'     |
| Glucokinase                              | <i>Gck</i>     | 5'-CCCTGAGTGGCTTACAGTTC-3'<br>5'-ACGGATGTGAGTGTGAAGC-3'       |
| Glucose Phosphate Isomerase              | <i>Gpi1</i>    | 5'-TCAAGCTGCGGAACTTTTTG-3'<br>5'-GGTCTTGAGTAGTCCACCAG-3'      |
| Liver Phosphofructokinase                | <i>Pfkl</i>    | 5'-GGAGGCGAGAACATCAAGCC-3'<br>5'-CGGCCTTCCCTCGTAGTGA-3'       |
| Aldolase-B                               | <i>Aldob</i>   | 5'-GAAACCGCCTGCAAAGGATAA-3'<br>5'-GAGGGTCTCGTGGAAAAGGAT-3'    |
| Triose Phosphate Isomerase               | <i>Tpi1</i>    | 5'-CCAGGAAGTTCTTCGTTGGGG-3'<br>5'-CAAAGTCGATGTAAGCGGTGG-3'    |
| Glyceraldehyde-3-Phosphate Dehydrogenase | <i>Gapdh</i>   | 5'-AGGTCCGGTGTGAACGGATTTG-3'<br>5'-GGGGTCGTTGATGGCAACA-3'     |
| Phosphoglycerate kinase                  | <i>Pgk1</i>    | 5'-ATGTCGCTTCCAACAAGCTG-3'<br>5'-GCTCCATTGTCCAAGCAGAAT-3'     |
| Phosphoglycerate mutase                  | <i>Pgam1</i>   | 5'-TCTGTGCAGAAGAGAGCAATCC-3'<br>5'-CTGTCAGACCGCCATAGTGT-3'    |
| Enolase                                  | <i>Eno1</i>    | 5'-TGCGTCCACTGGCATCTAC-3'<br>5'-CAGAGCAGGCGCAATAGTTTTA-3'     |
| Liver Pyruvate Kinase (L-PK)             | <i>Pklr</i>    | 5'-TCAAGGCAGGGATGAACATTG-3'<br>5'-CACGGGTCTGTAGCTGAGTG-3'     |
| PEP Carboxykinase (PEPCK)                | <i>Pck1</i>    | 5'-CTGCATAACGGTCTGGACTTC-3'<br>5'-CAGCAACTGCCCGTACTCC-3'      |
| Glucose-6-Phosphatase                    | <i>G6pc</i>    | 5'-CGACTCGCTATCTCCAAGTGA-3'<br>5'-GGGCGTTGTCCAAACAGAAT-3'     |
| β-actin                                  | <i>Actb</i>    | 5'-TTGGGTATGGAATCCTGTGG-3'<br>5'-CTTCTGCATCCTGTCAGCAA-3'      |
| 18S                                      | <i>18s</i>     | 5'-CTTAGAGGGACAAGTGGCG-3'<br>5'-ACGCTGAGCCAGTCAGTGTA-3'       |
