# Supplementary material
Source: PubMed Central journal article supplement (PMC5481556)

Supplemental Figure 1

**A**

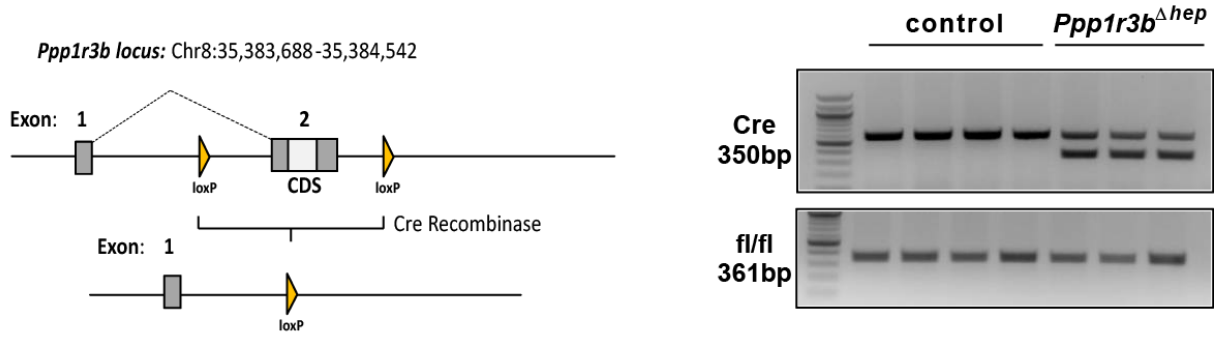

**B**

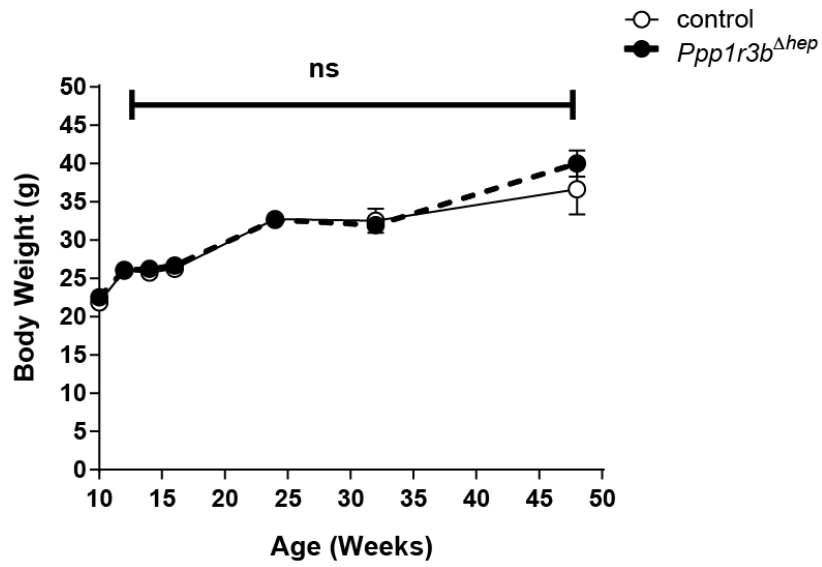

**C**

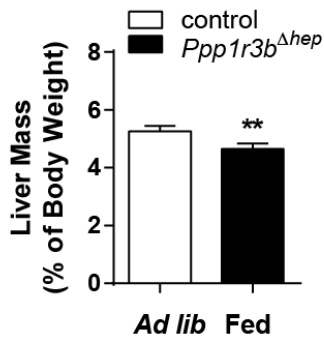

**D**

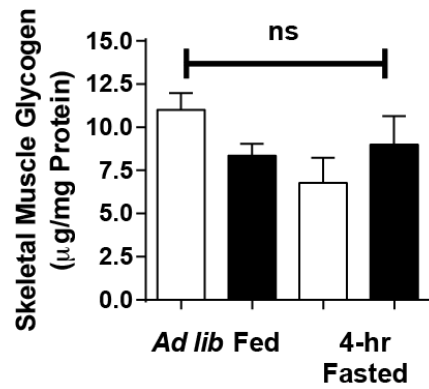

Supplement: 10.1074_M116.766329_jbc.M116.766329-1.pdf [file 10.1074_M116.766329_jbc.M116.766329-1.pdf]

Supplemental Figure 2

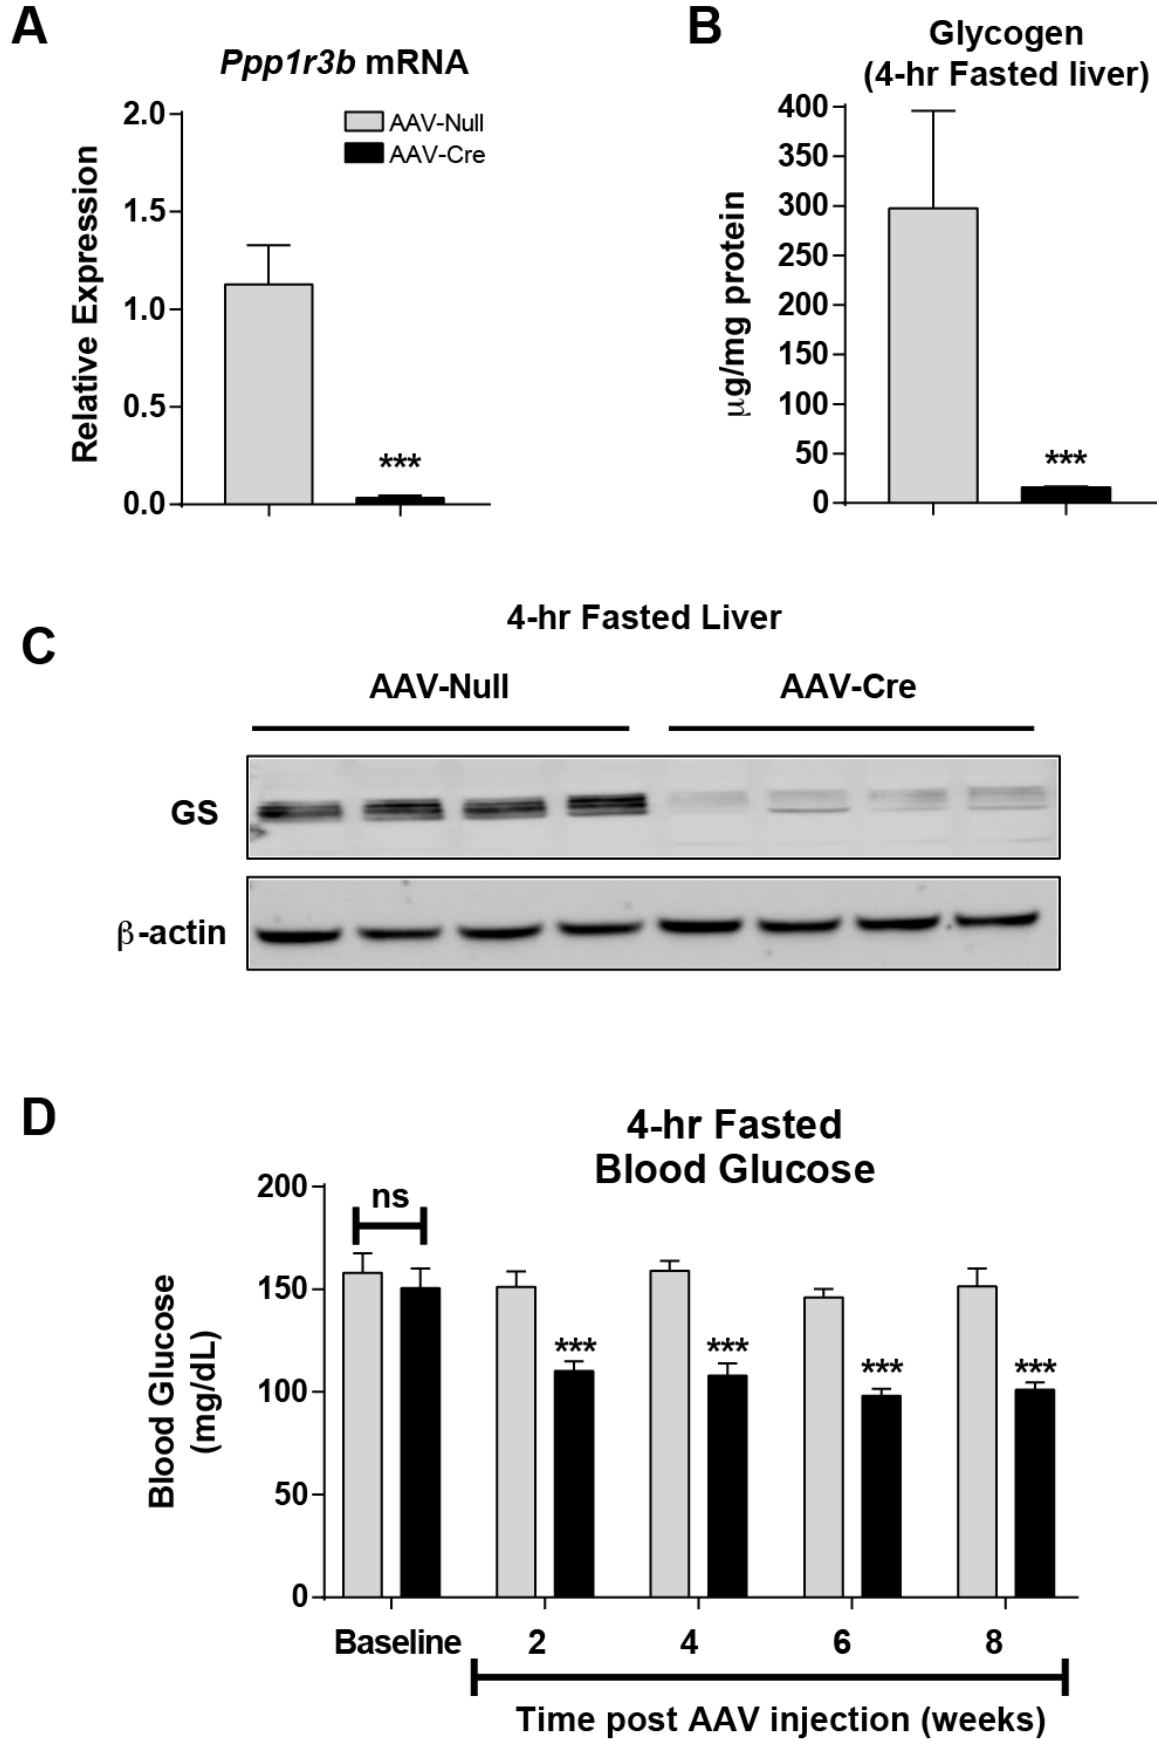

Supplement: 10.1074_M116.766329_jbc.M116.766329-2.pdf [file 10.1074_M116.766329_jbc.M116.766329-2.pdf]
